# Supplementary material for: The decline of malaria in Finland – the impact of the vector and social variables
Source: PubMed Central journal article supplement (PMC2684538; doi:10.1186/1475-2875-8-94), 2009-05-07

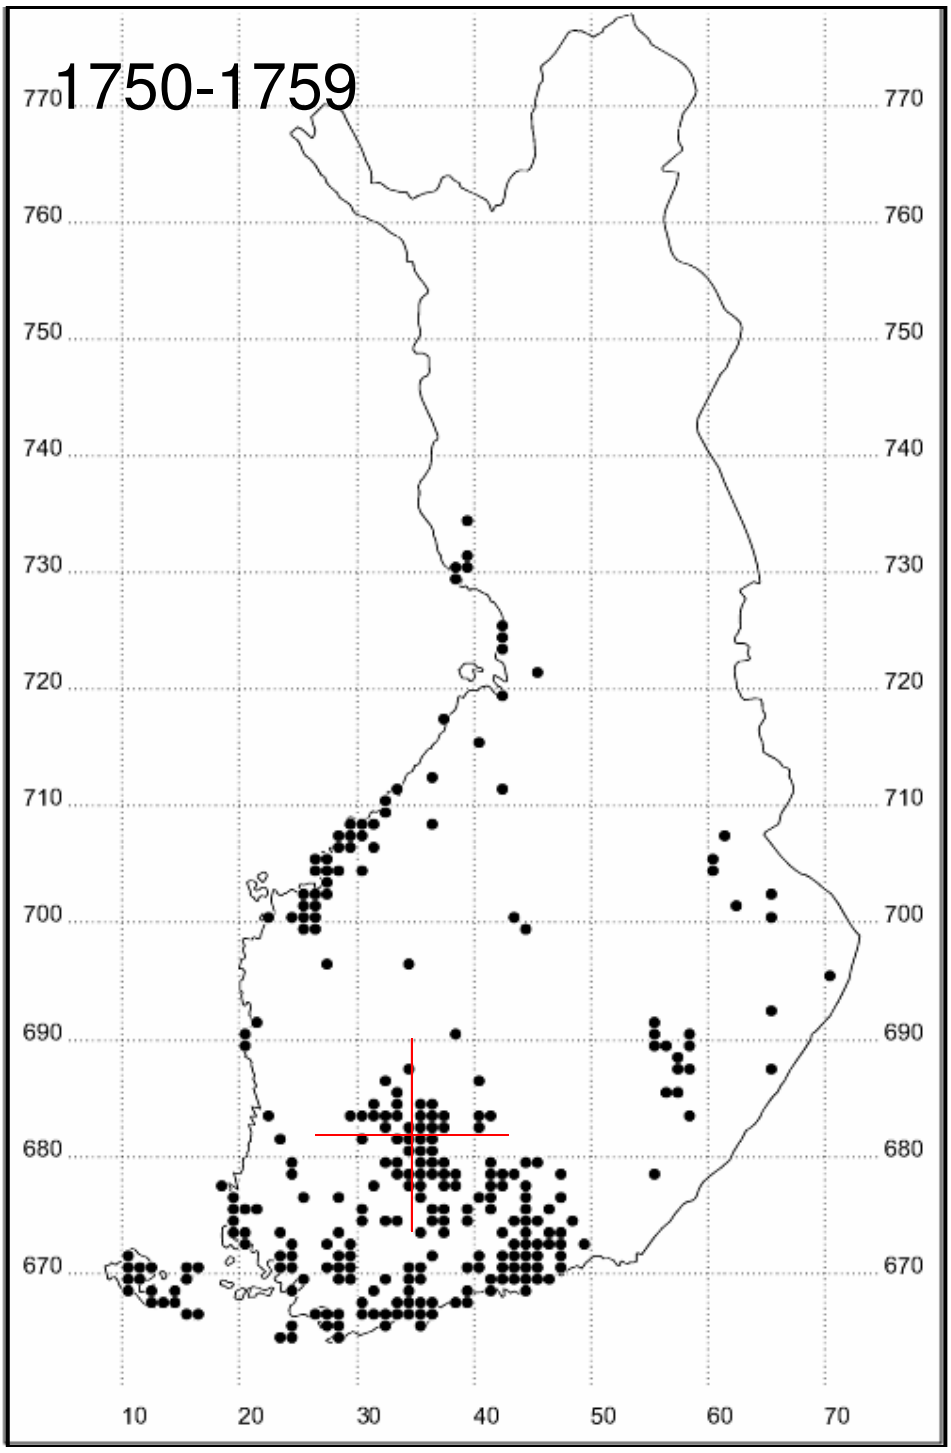

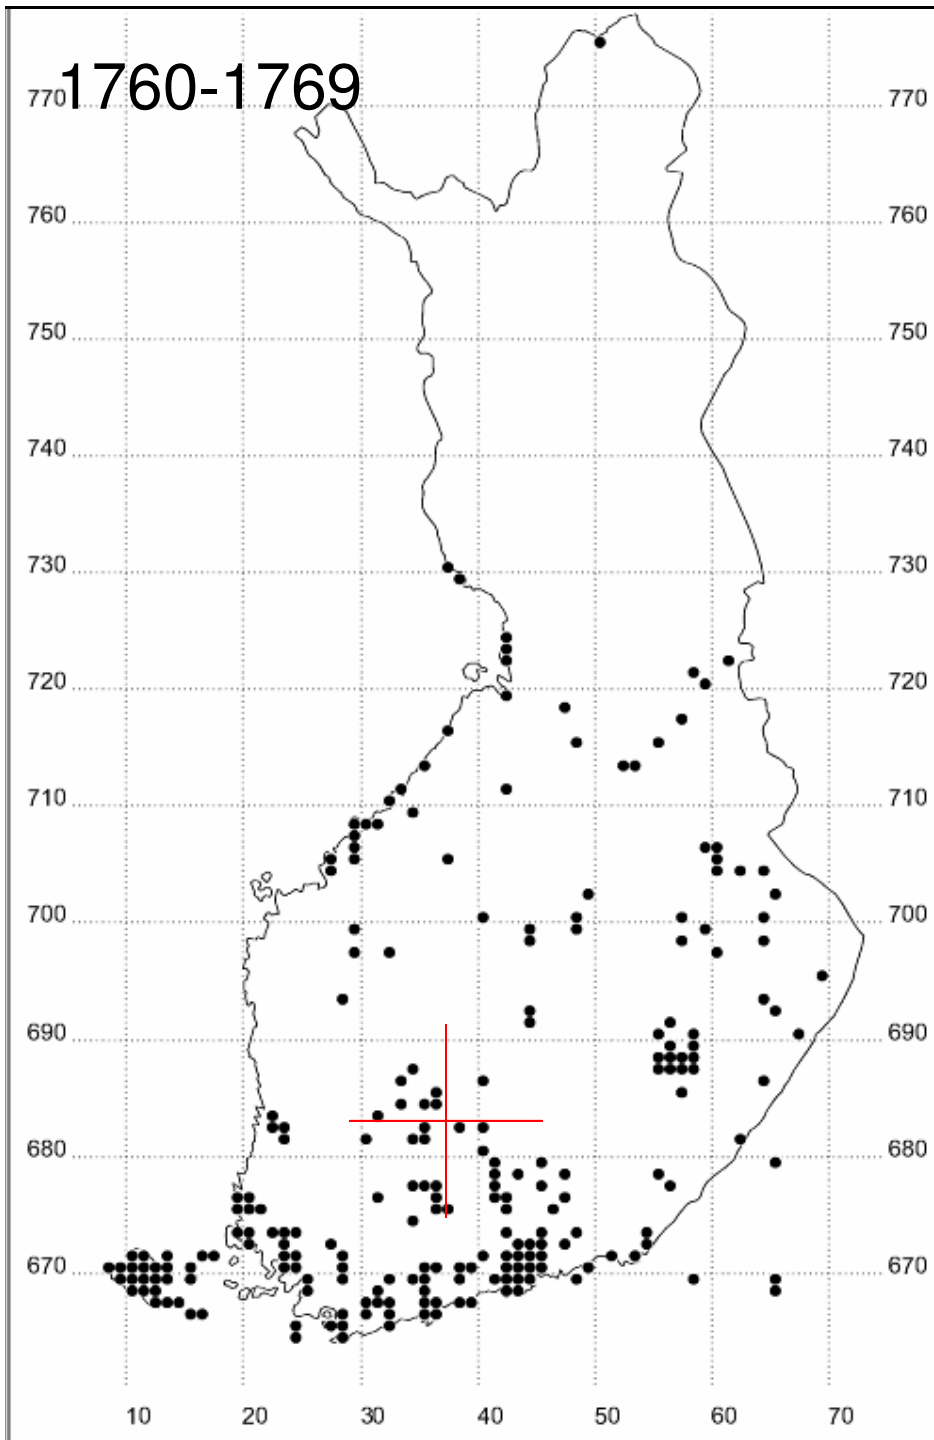

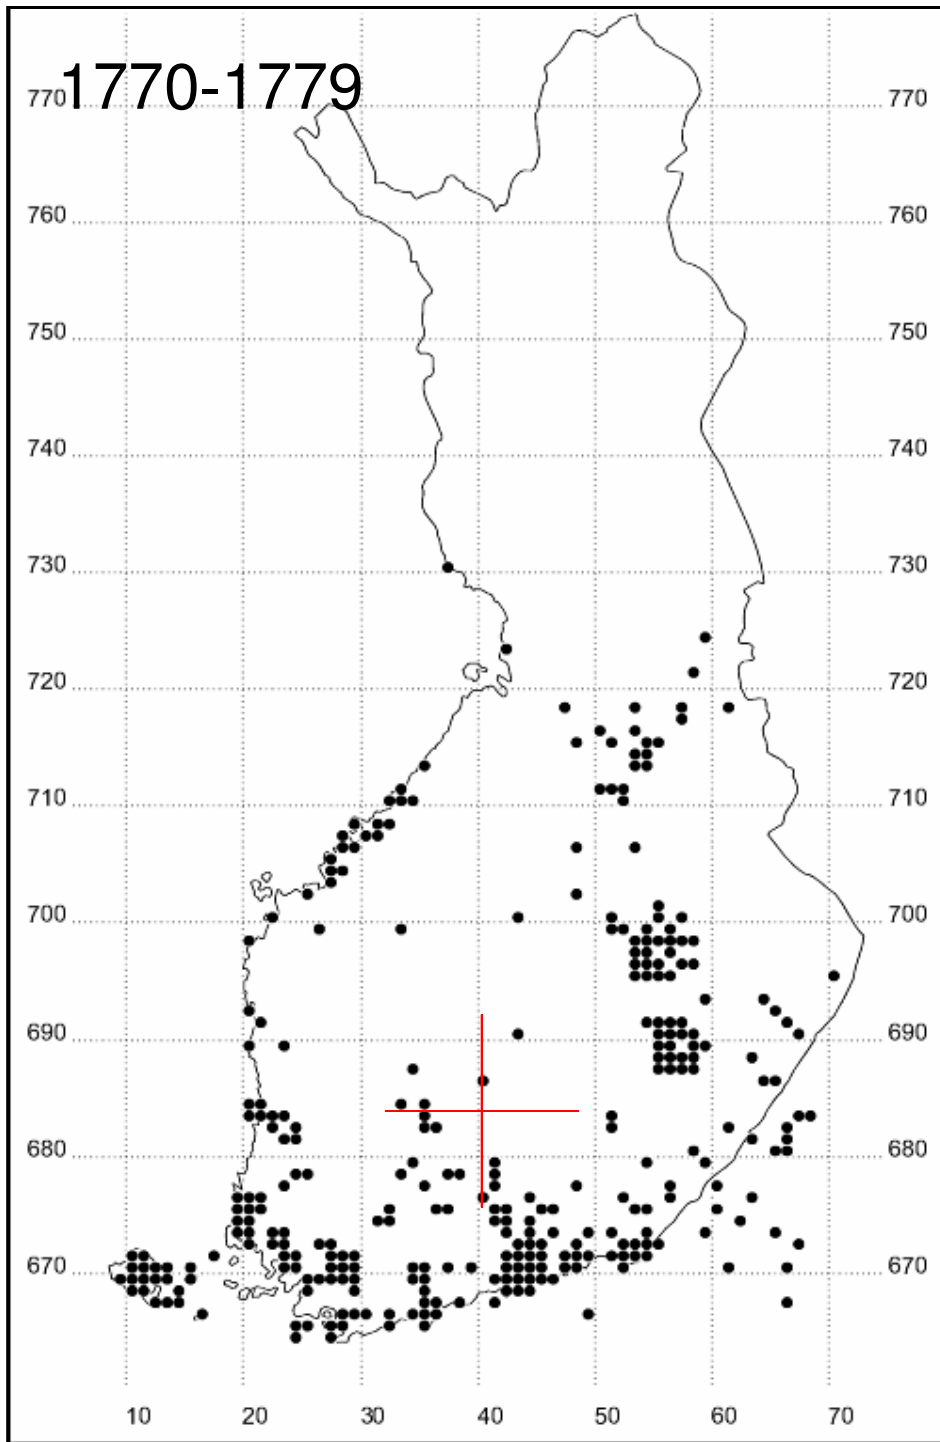

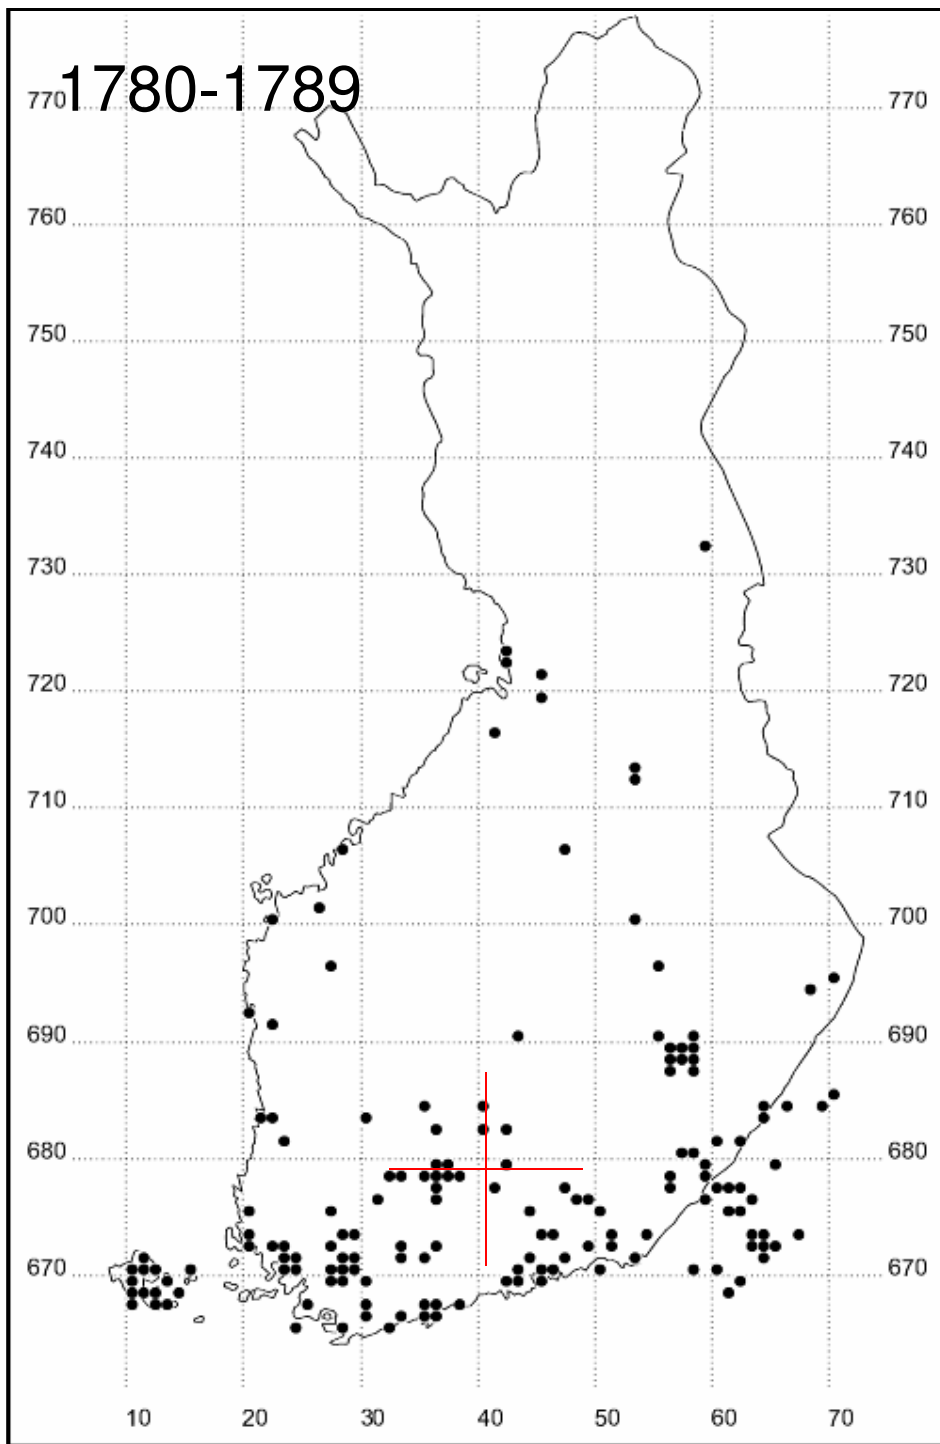

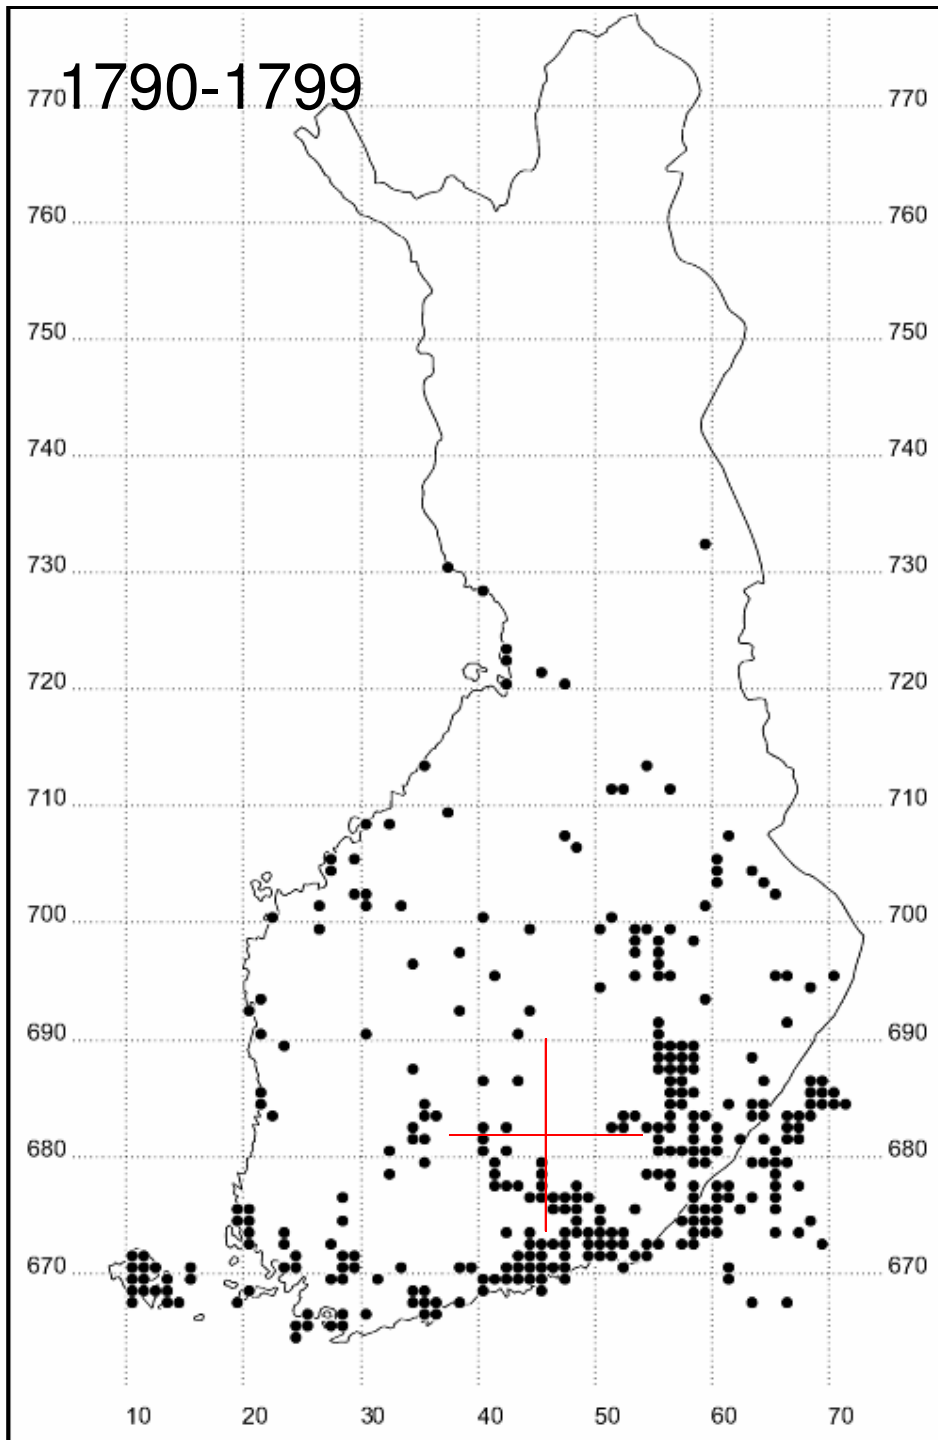

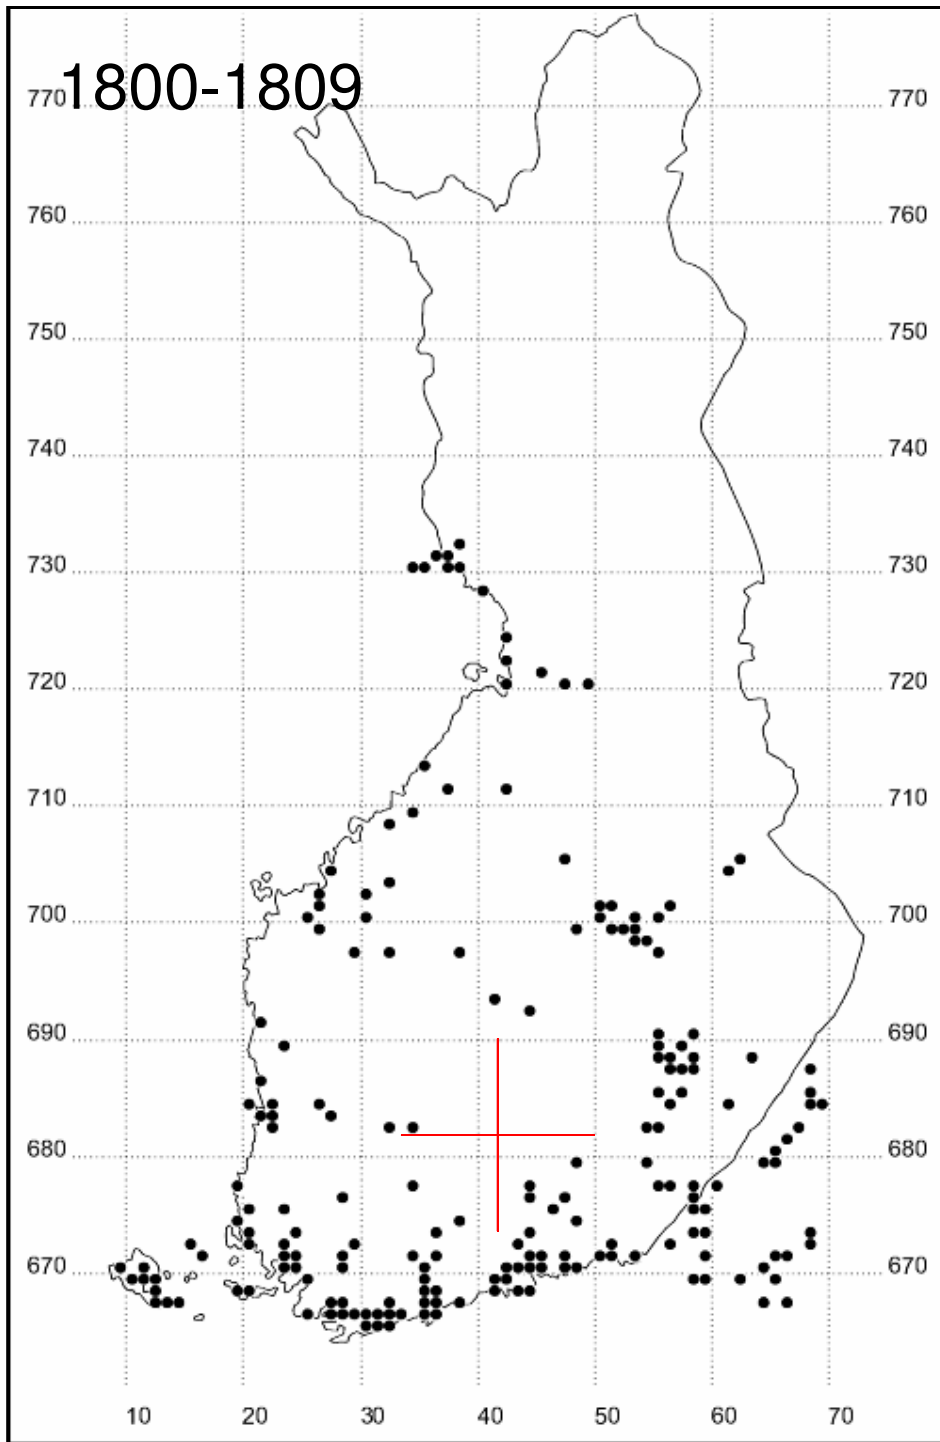

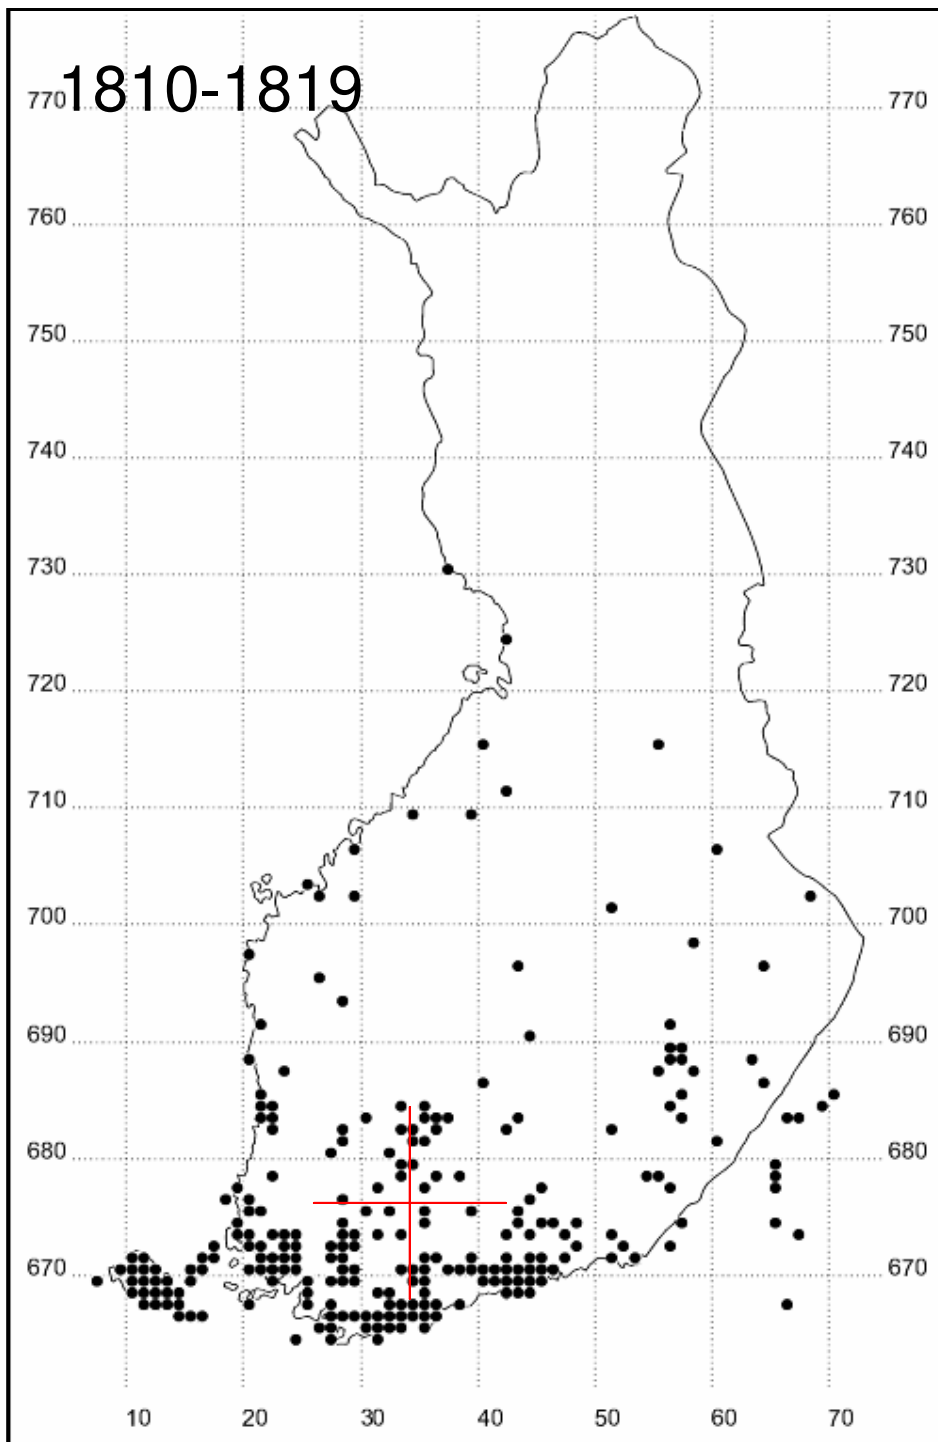

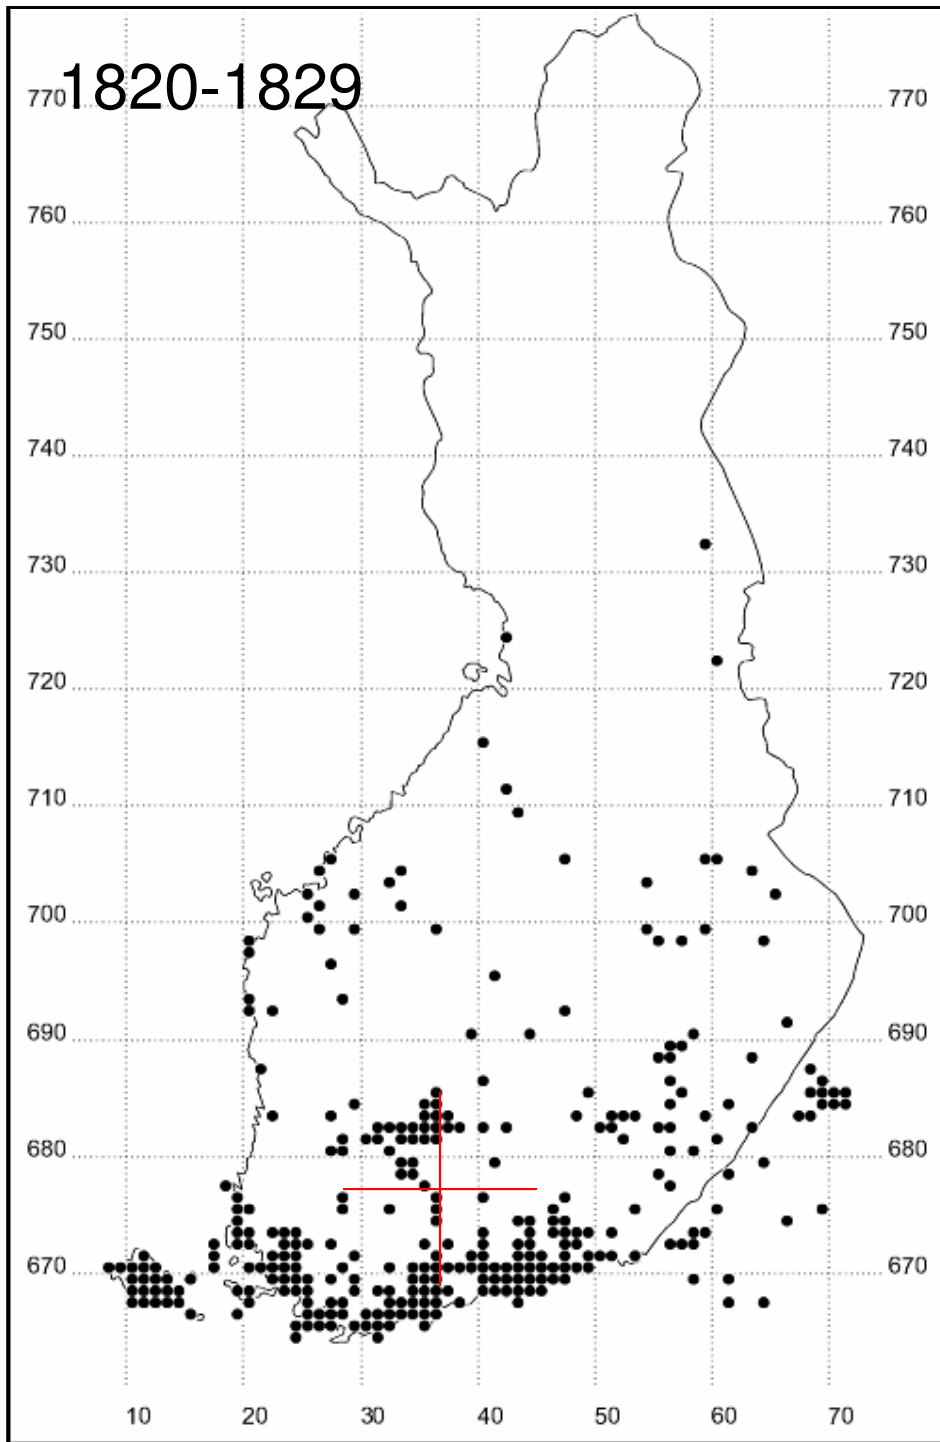



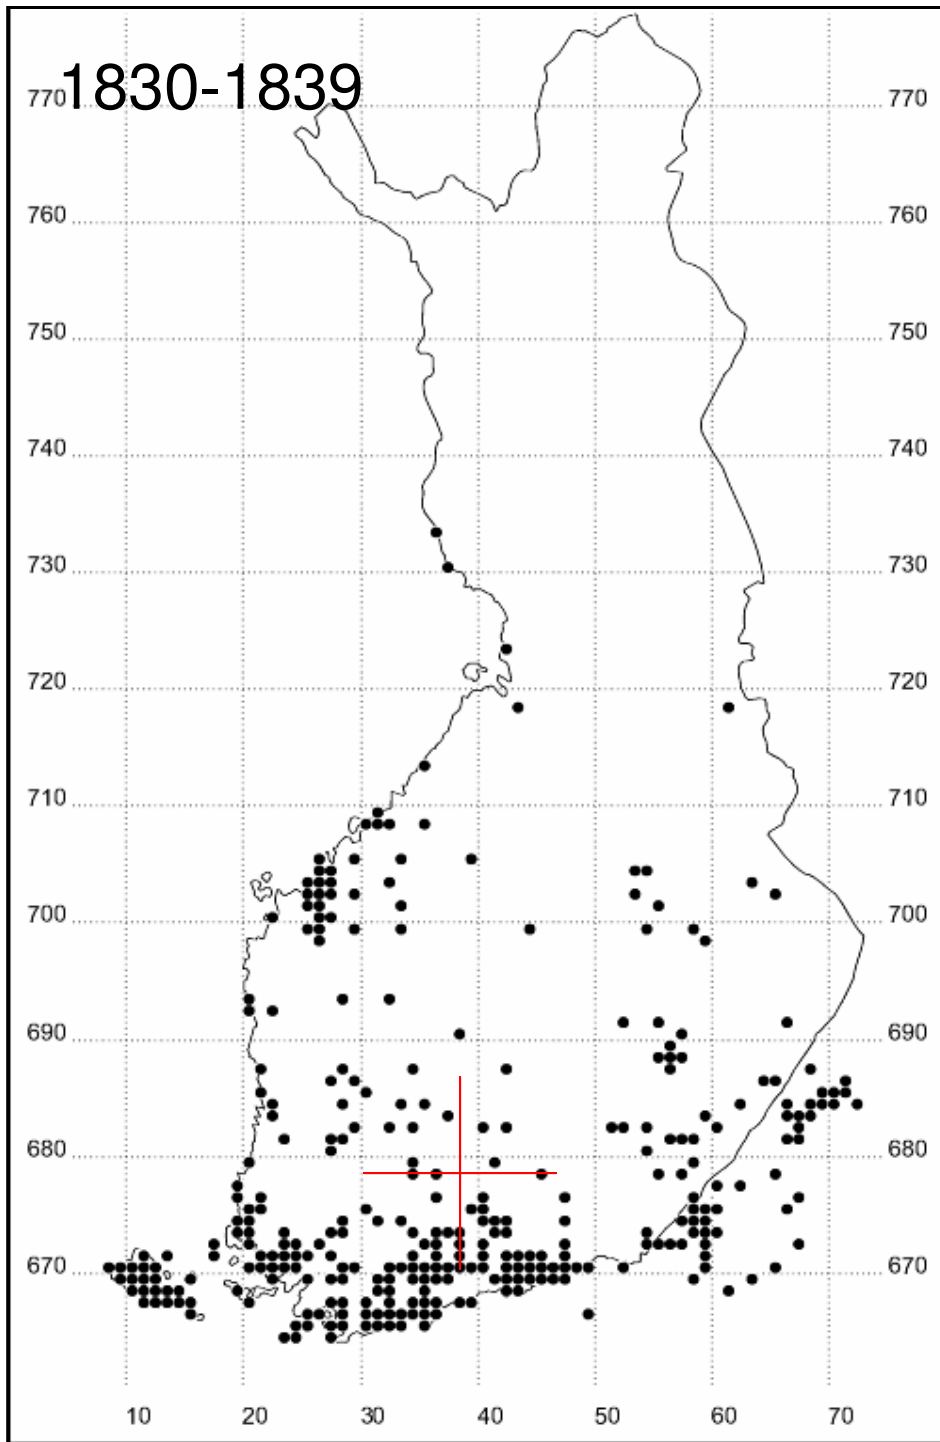

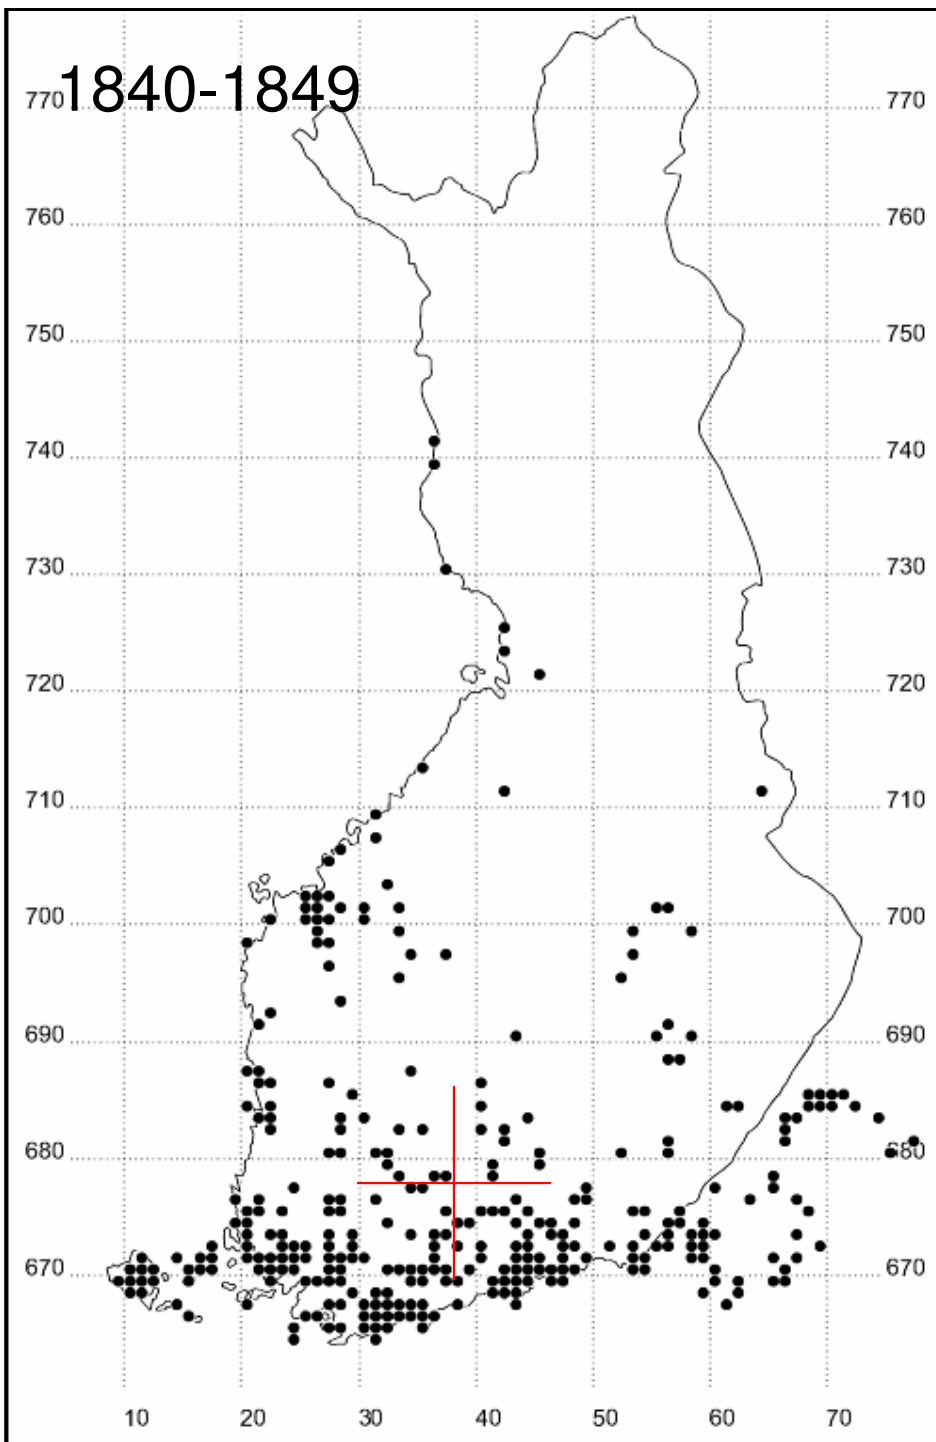

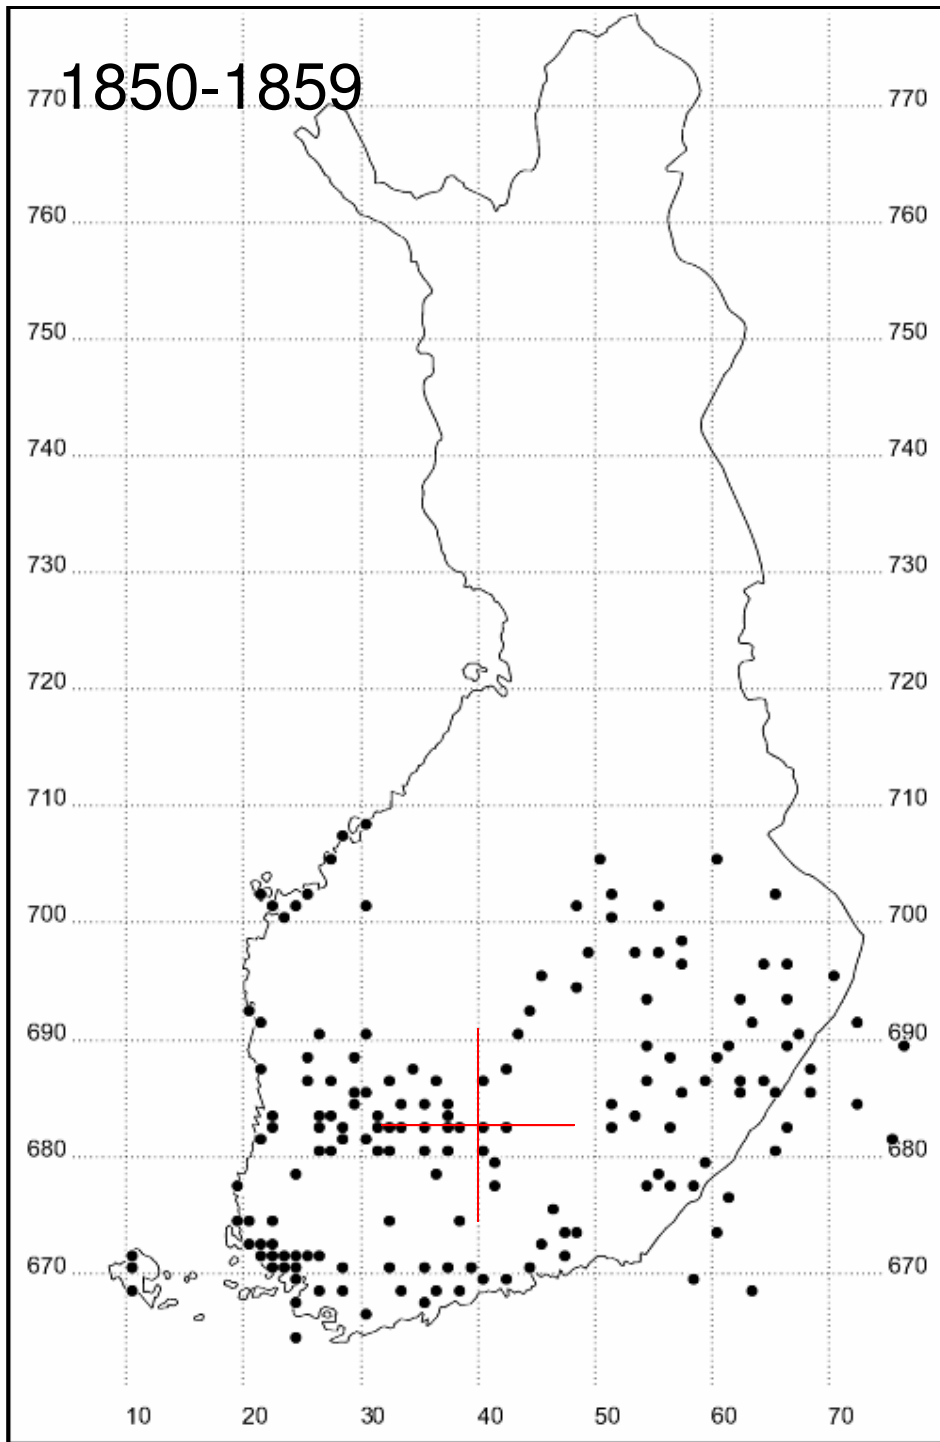

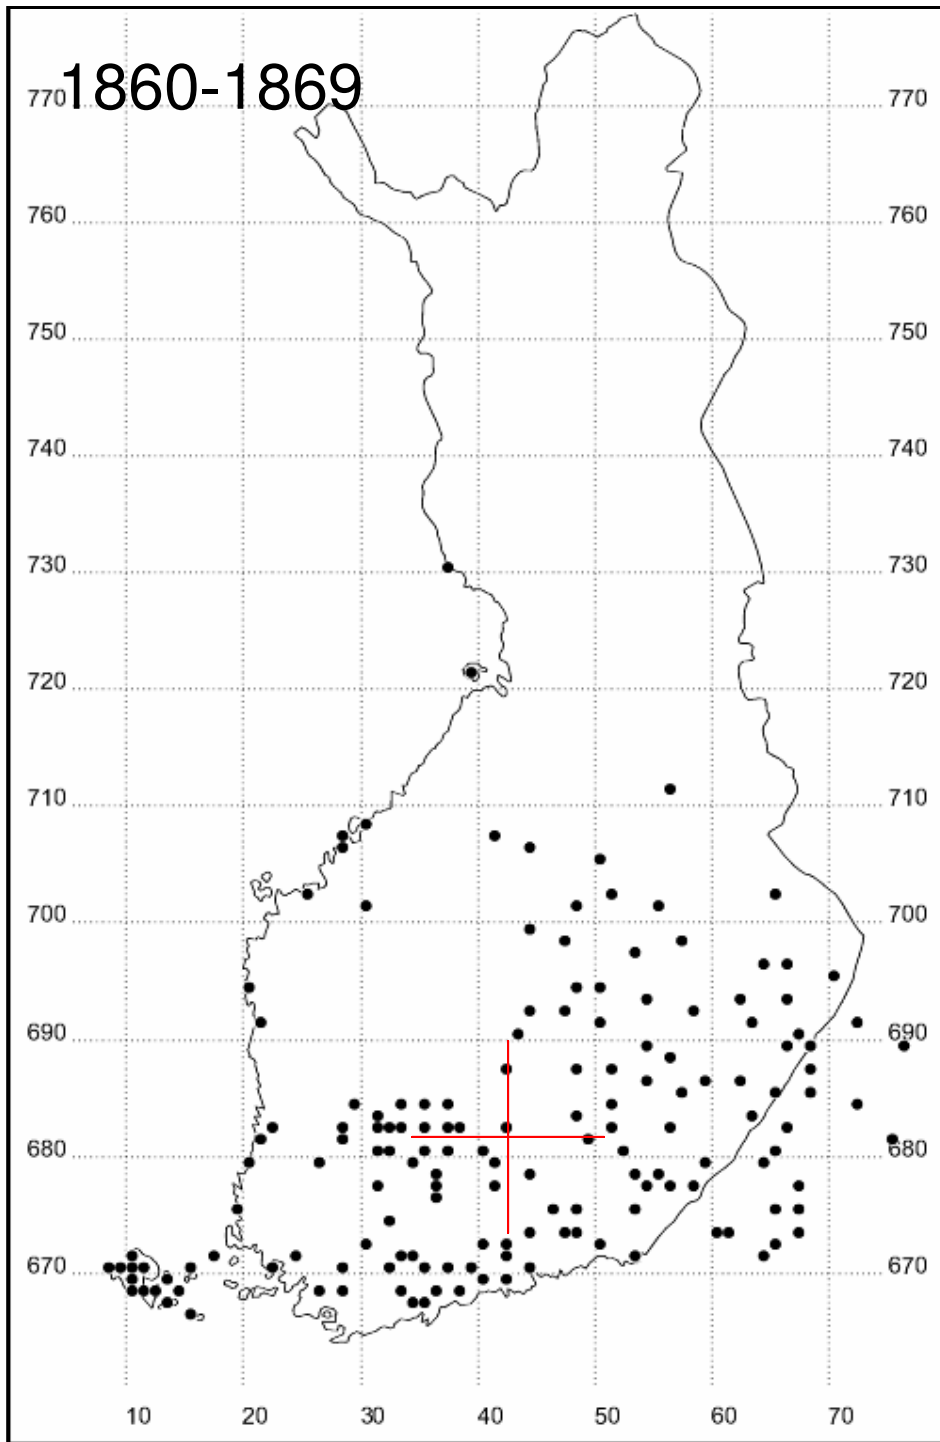

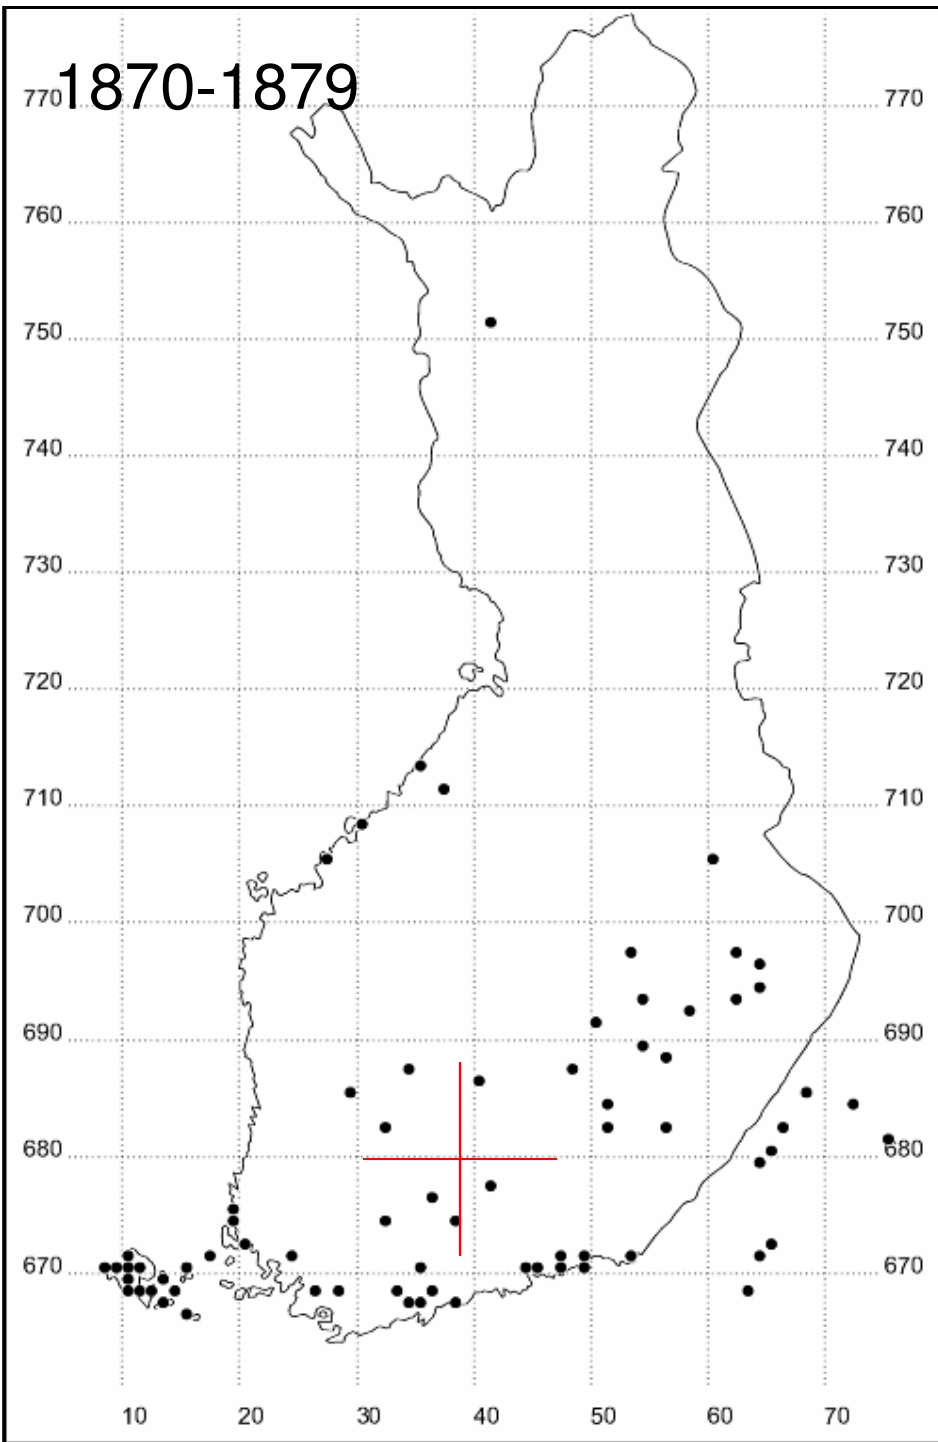

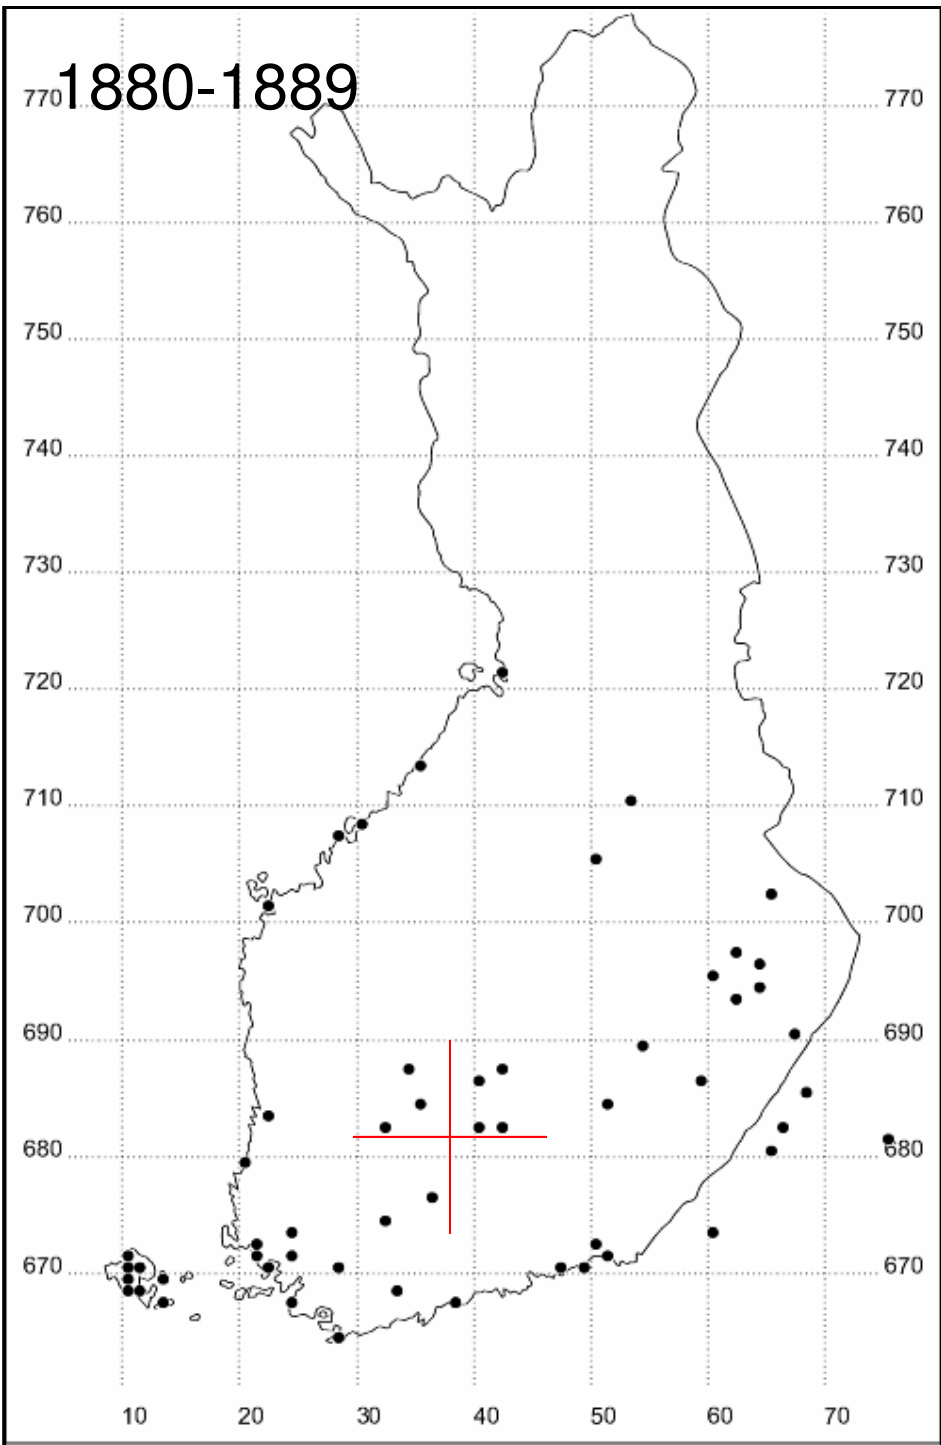

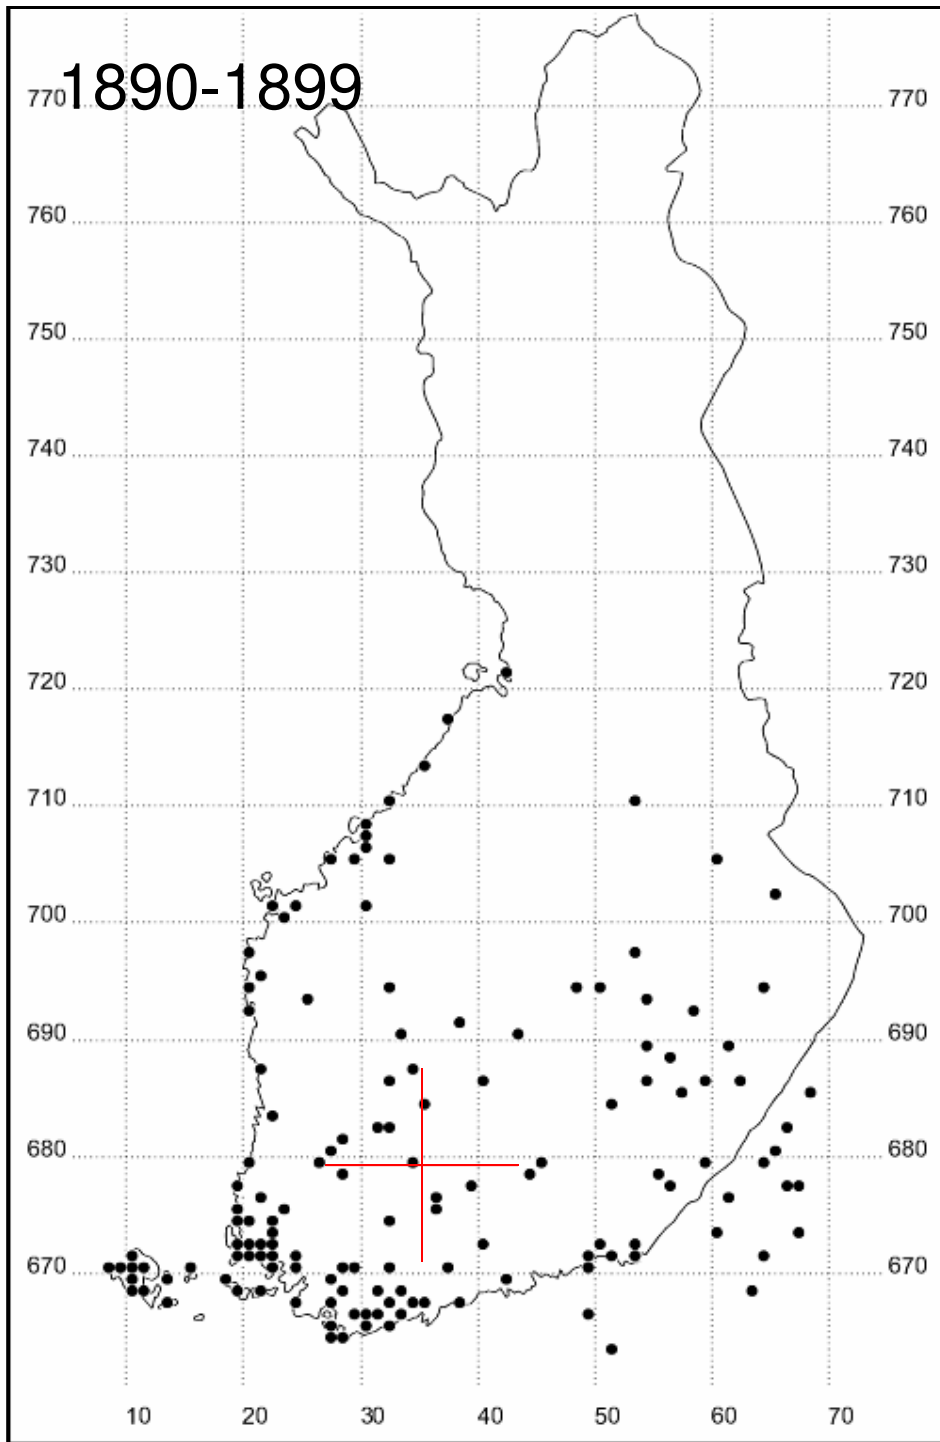

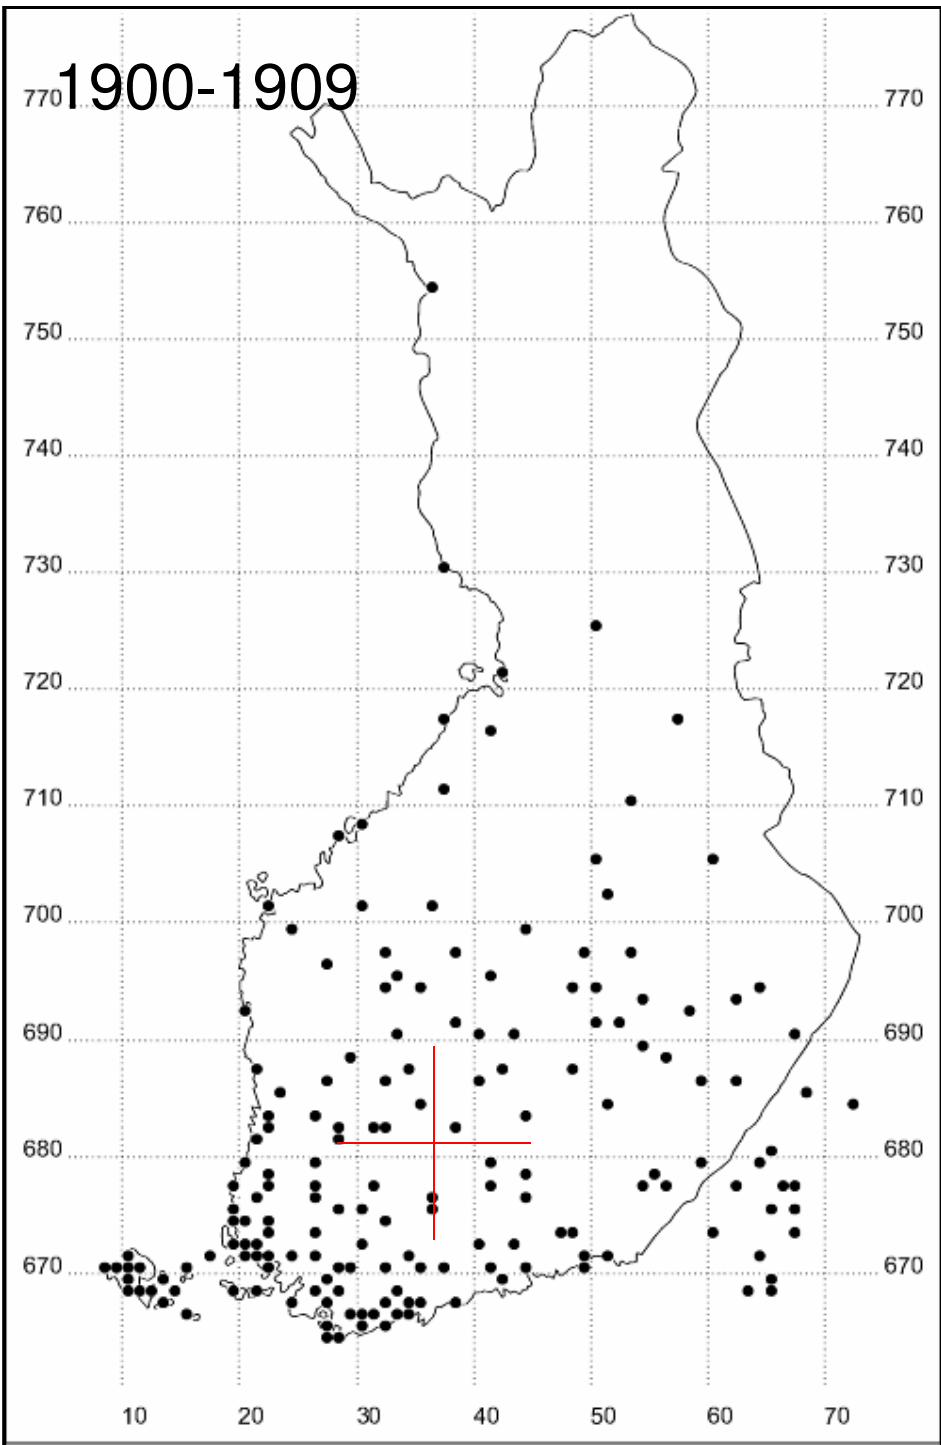



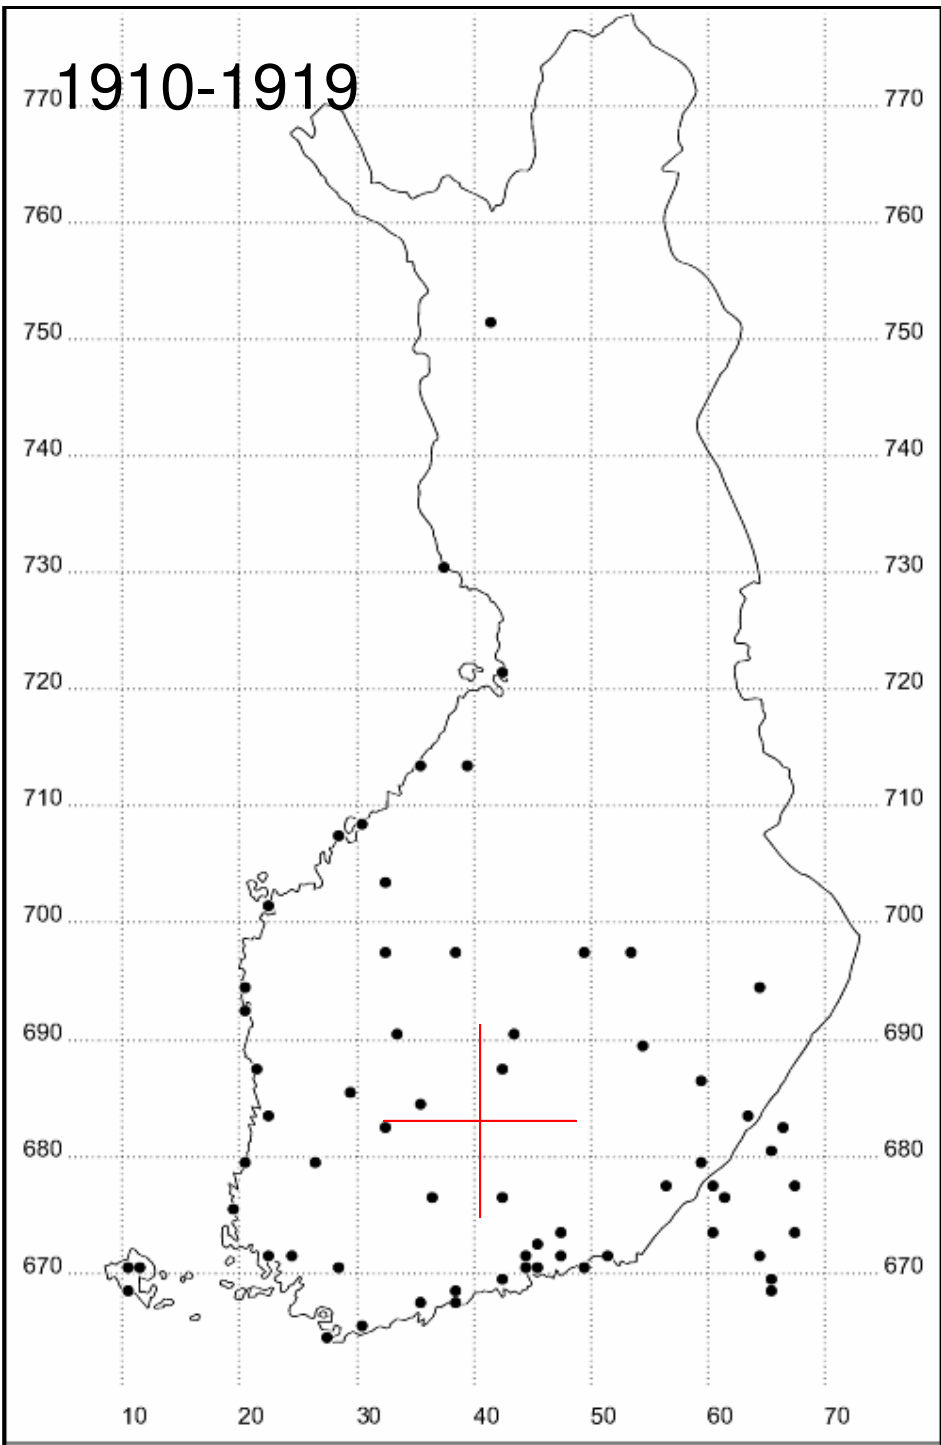

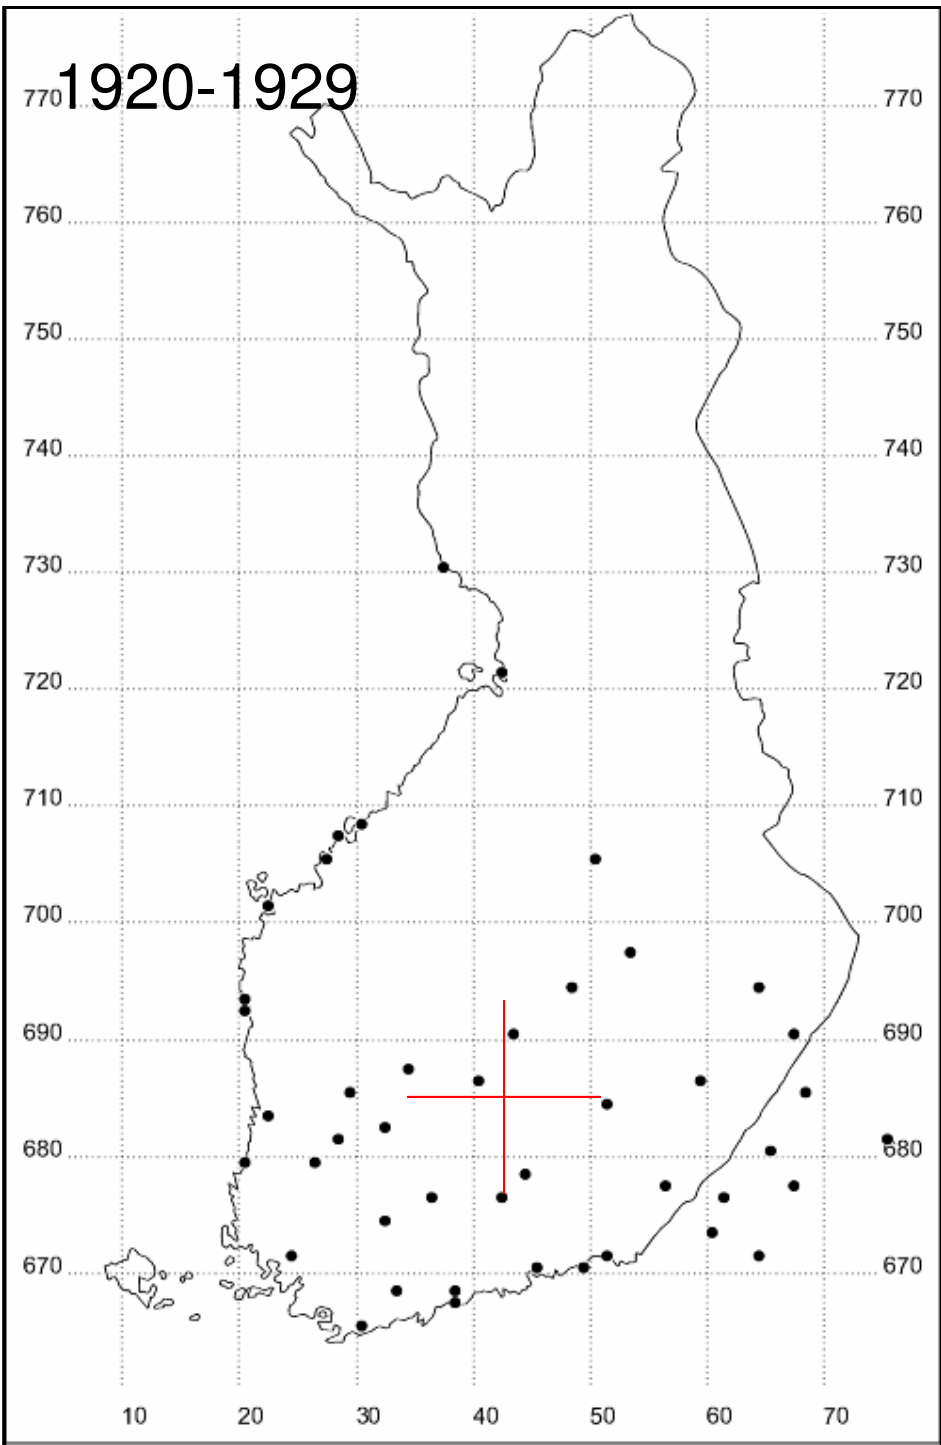

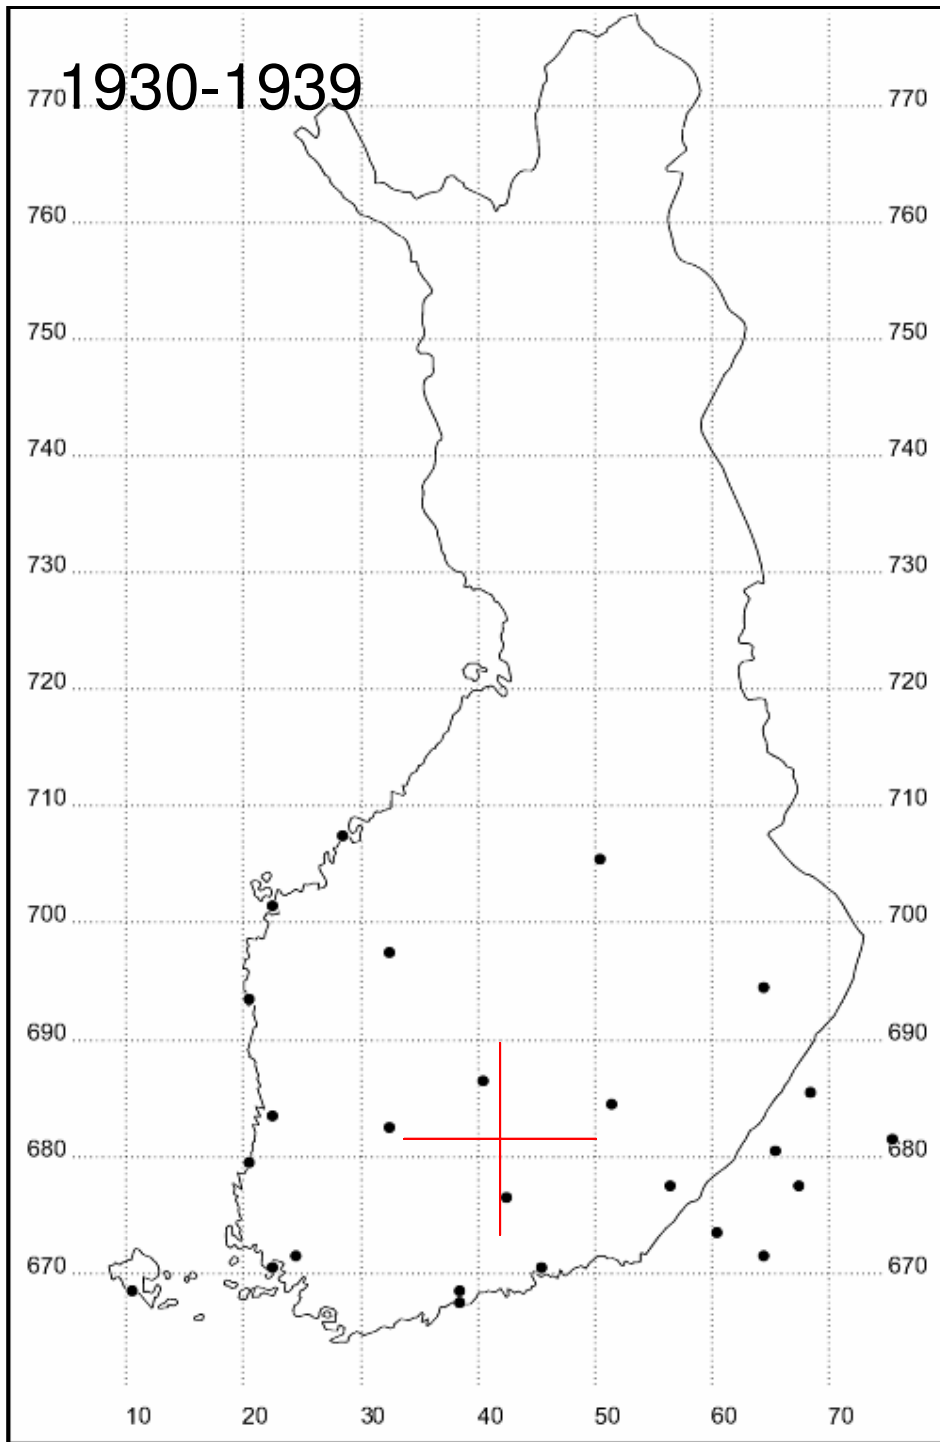

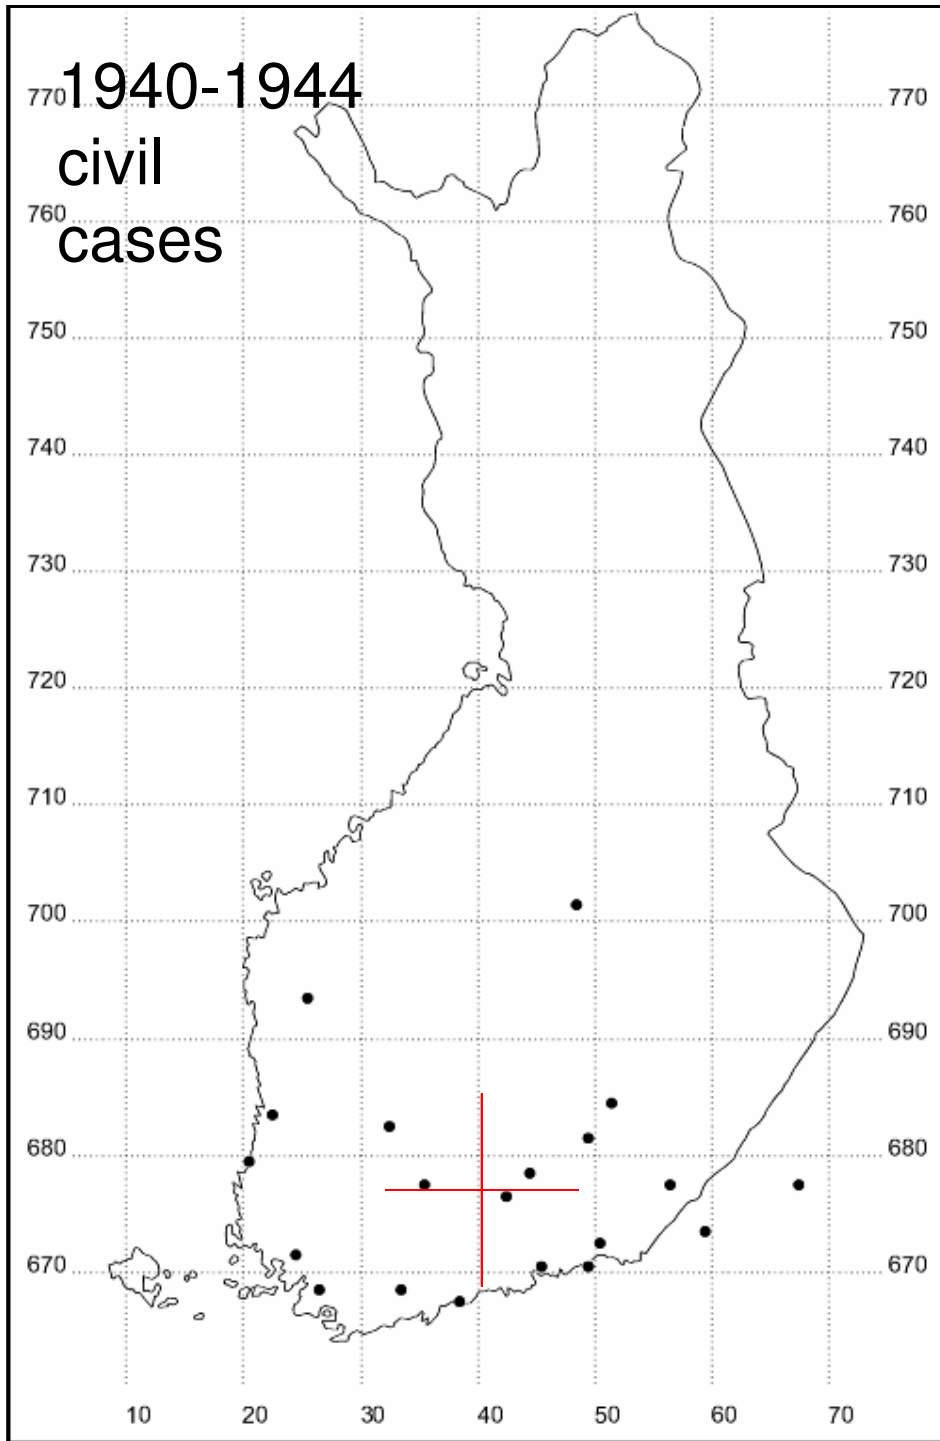

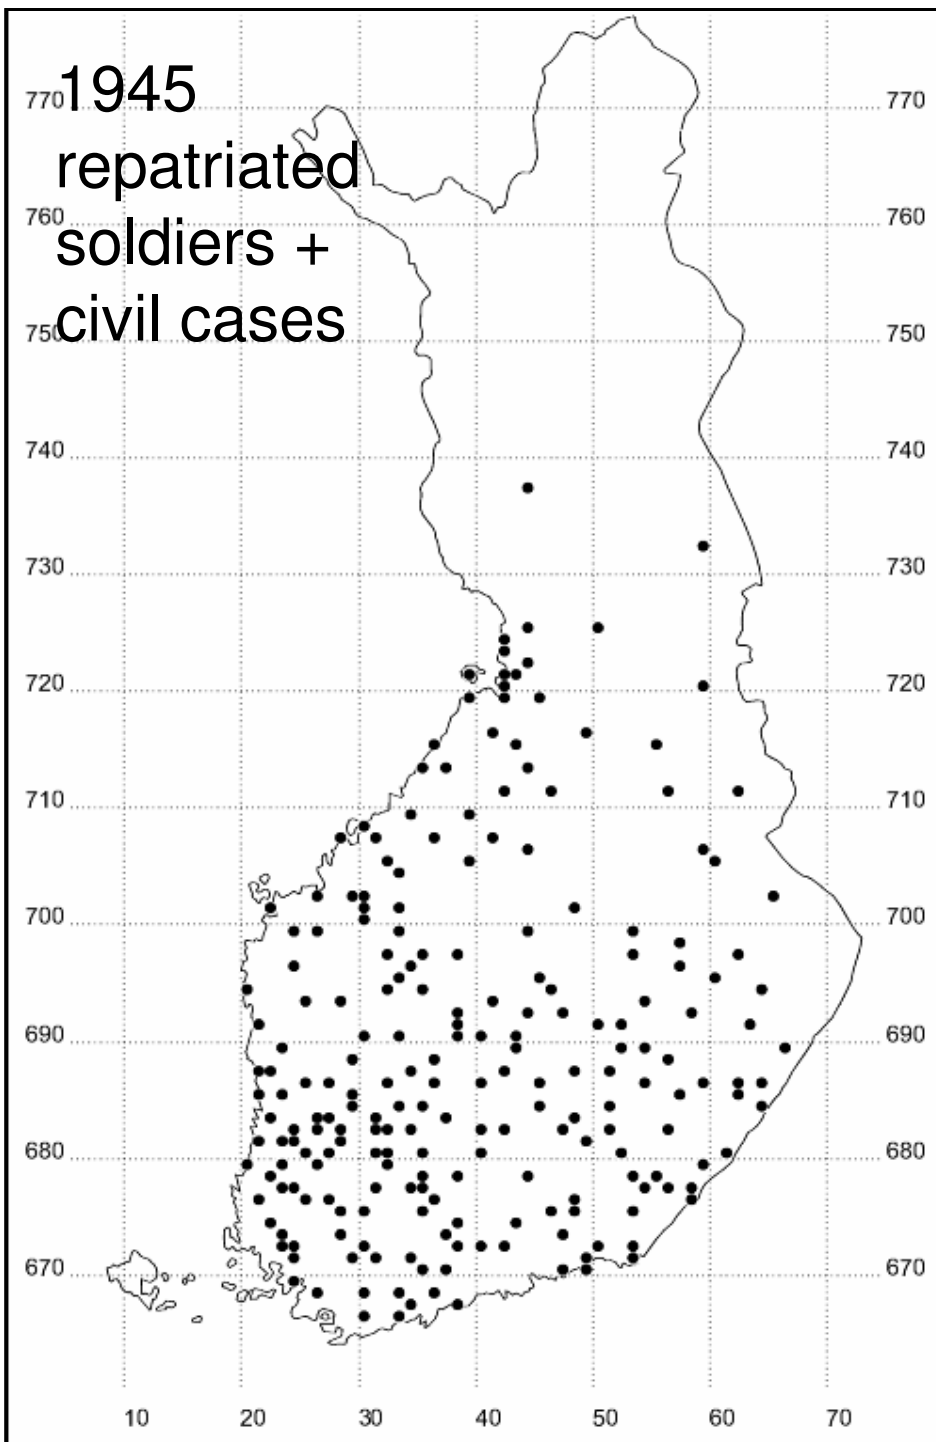

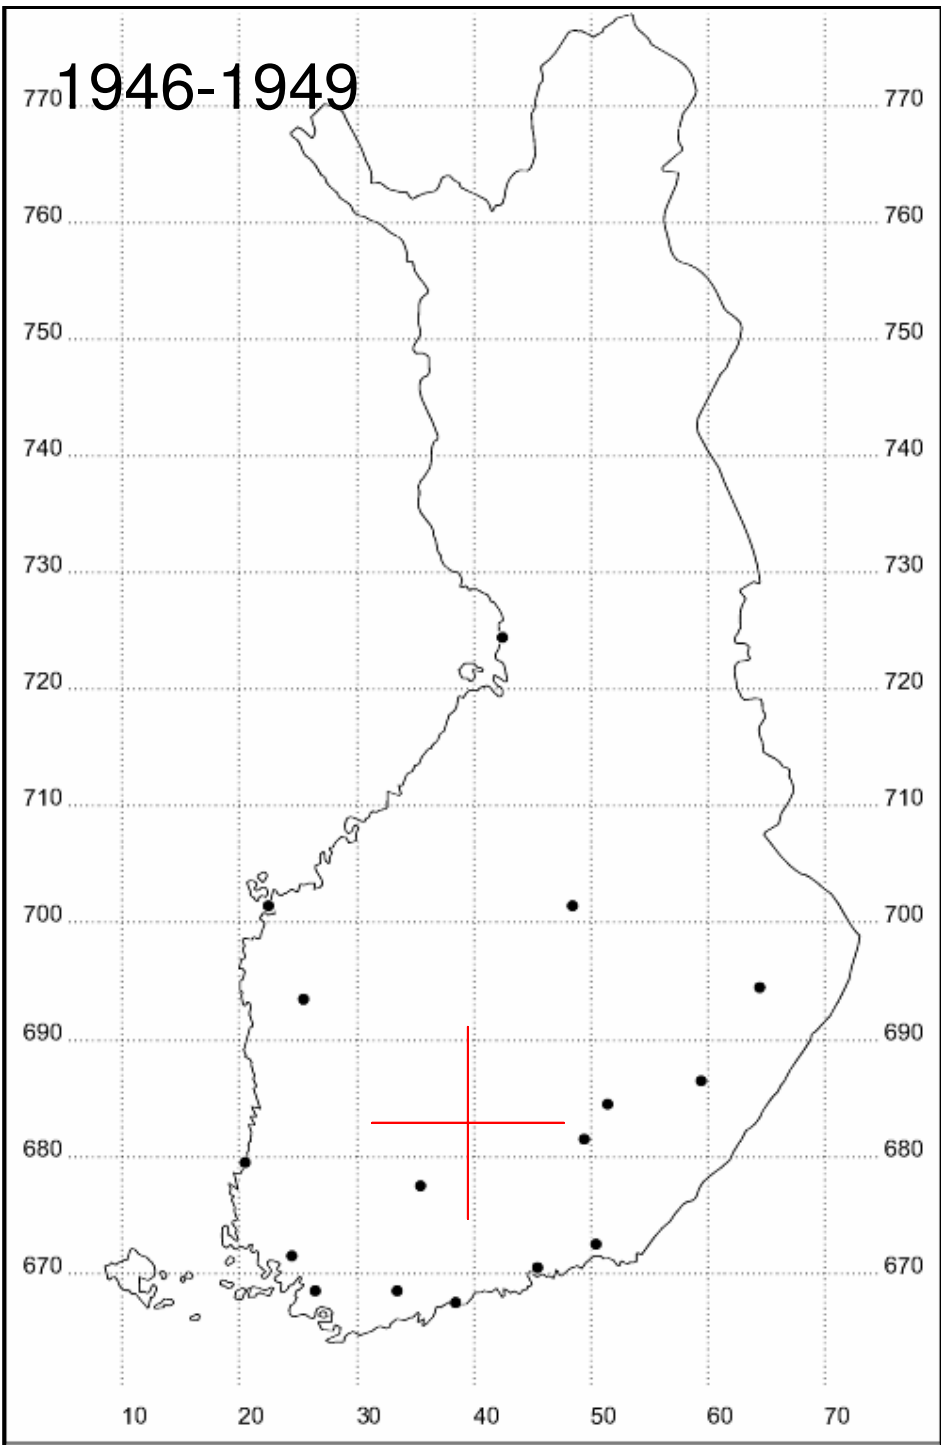

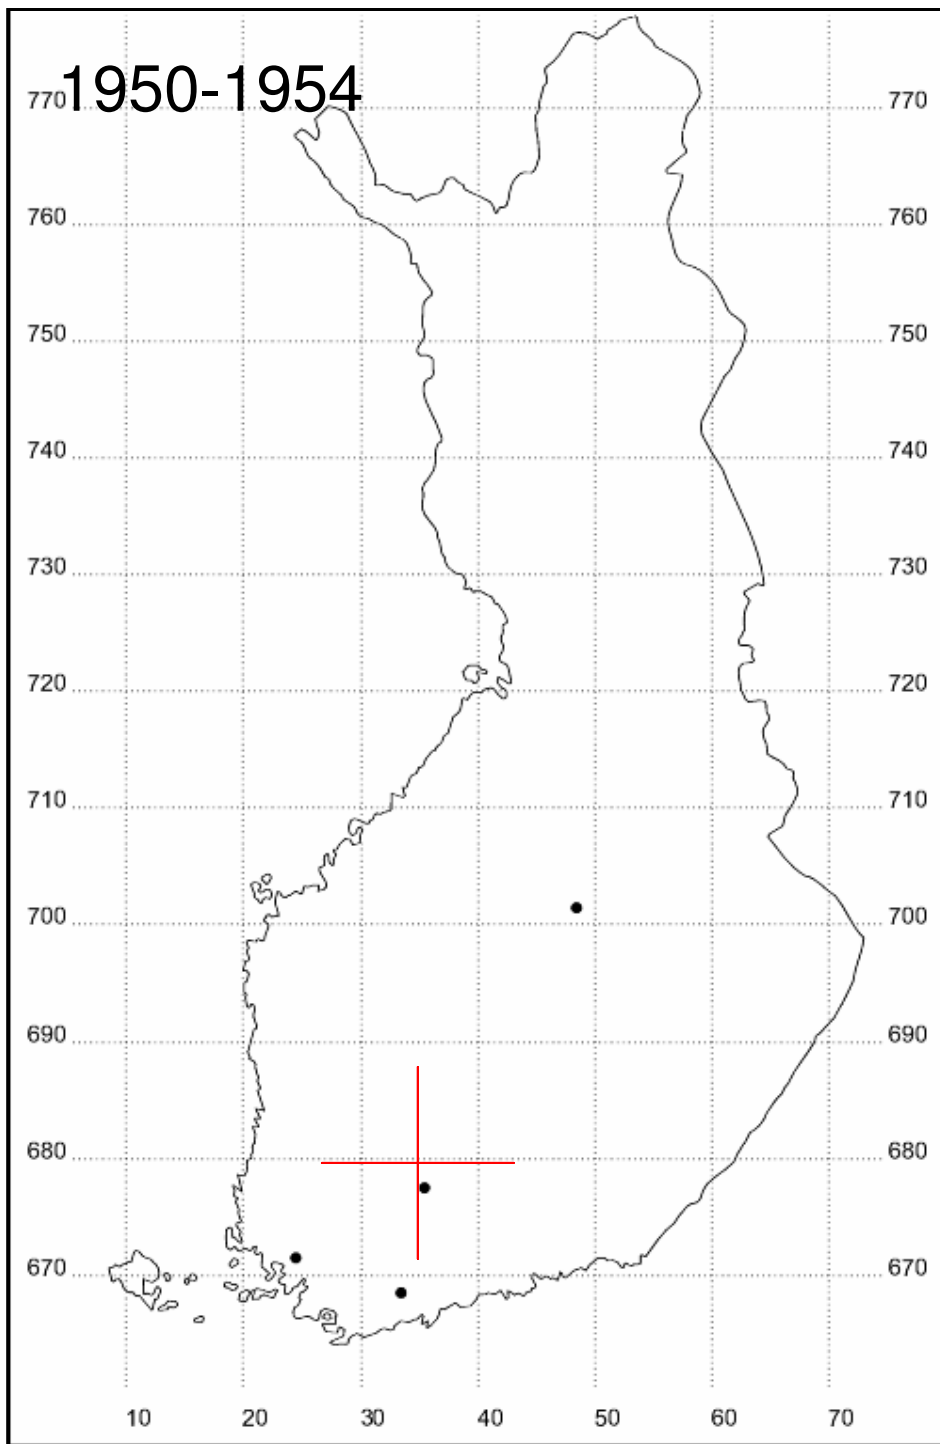

Supplement: 1475-2875-8-94-S1.pdf [file 1475-2875-8-94-S1.pdf]
